# Supplementary material for: Delineating the Association Between Soluble CD26 and Autoantibodies Against G-Protein Coupled Receptors, Immunological and Cardiovascular Parameters Identifies Distinct Patterns in Post-Infectious vs. Non-Infection-Triggered Myalgic Encephalomyelitis/Chronic Fatigue Syndrome
Source: Front Immunol. 2021 Apr 6;12:644548. doi: 10.3389/fimmu.2021.644548 (PMC8056217; doi:10.3389/fimmu.2021.644548)
Supplement: Supplementary Data Sheet 3 — Assessment of sCD26 expression on immune cells in ME/CFS and HC (percentages of CD26 expressing cells, MFI). [file DataSheet_3.xlsx]

## Sheet: Age (in years)
HC	ME/CFS
29	77
33	52
54	32
29	62
42	28
40	27
34	50
36	36
57	57
32	53
27	56
30	53

## Sheet: CD26+CD4+ in %
HC	ME/CFS
68.7	81.1
85.4	92.8
87.5	92.6
88.9	84.5
73.7	84.4
78.8	91.1
87.2	88.4
87.4	88.3
74.4	85.7
79.9	85.5
87.6	88.9
82.6	91.3

## Sheet: CD26+CD4+ MFI pos
HC	ME/CFS
4482	6803
3924	6454
5861	8935
5876	6454
4879	4438
6015	6238
4416	6303
6785	5469
5132	3449
5029	5483
4723	5224
3982	4527

## Sheet: CD26+CD8+ in %
HC	ME/CFS
58	45.4
61.5	76.8
50	80
71.9	33.1
56.2	58.3
45.9	82.2
73.9	61.2
72.8	80.3
45.5	46.3
55.5	23.9
79.3	76.3
	66.7

## Sheet: CD26+CD8+ MFI pos
HC	ME/CFS
8343	6420
5742	4641
4904	11937
4001	4966
11020	3367
3701	3674
3185	4867
5697	4794
4892	2477
3764	3508
5042	4953
7270	2857

## Sheet: CD26+CD56+ in %
HC	ME/CFS
12	34.4
35.5	22.2
15.7	68.1
22.1	15.4
9.94	29.3
19.9	45.2
16.9	80.7
24.6	75.4
36.8	21.2
47.7	44.8
22.4	45.7
57.3	39.7

## Sheet: CD26+CD56+ MFI pos
HC	ME/CFS
3508	6437
3064	2789
6749	37336
2658	1702
2126	2489
2190	1867
1166	2588
3117	3551
3035	1896
1930	5054
2489	3064
1503	1268

## Sheet: CD26+CD19+ in %
HC	ME/CFS
2.41	9.76
3.15	4.12
3.57	7.32
2.12	2.97
3.04	3.9
7.14	7.31
6.72	31.3
7.92	38.2
6.93	11.6
10.2	6.33
4.99	6.86
26.4	21.2

## Sheet: CD26+CD19+ MFI pos
HC	ME/CFS
1292	1511
2417	1684
1300	1490
1542	1272
1170	1004
1511	1190
1067	1237
1120	1225
1060	1300
1248	1163
1159	1520
1332	1186

## Sheet: CD26+CD14+ in %
HC	ME/CFS
22.4	43
13.1	20.3
15	51.6
16	39
34.8	31.1
71.6	83.2
54	68.7
86.6	58.5
44.2	49.6
48.2	35.5
38	46
93.6	86.7

[truncated: 1 more sheets: CD26+CD14+ MFI pos]
